# Supplementary material for: Machine Learning Algorithms for Classification of MALDI-TOF MS Spectra from Phylogenetically Closely Related Species Brucella melitensis, Brucella abortus and Brucella suis
Source: MDPI journal article supplement (doi:10.3390/microorganisms10081658), 2022-08-17

**Figure S3:** Average silhouette coefficient vs. k-means models. Silhouette coefficient (SC) over a range of possible number of clusters (k). Here, since SC is maximized for  $k = 3$ , this k-means model was preferred. The optimal number of clusters is three.

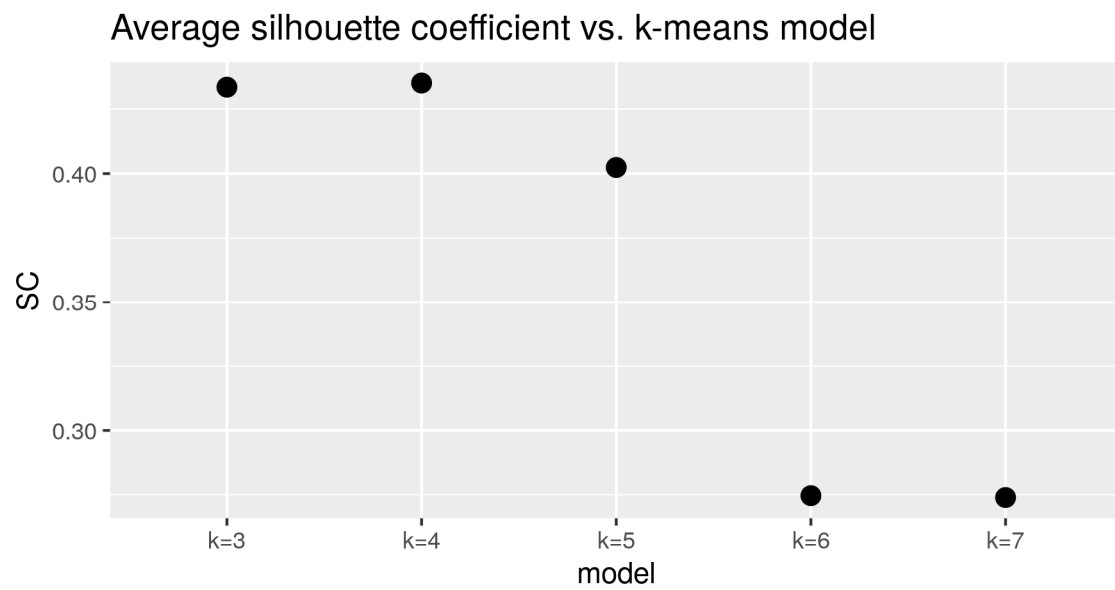

Supplement: s1 [file s1]
