# Supplementary material for: Machine Learning Algorithms for Classification of MALDI-TOF MS Spectra from Phylogenetically Closely Related Species Brucella melitensis, Brucella abortus and Brucella suis
Source: MDPI journal article supplement (doi:10.3390/microorganisms10081658), 2022-08-17

**Figure S1:** MALDI-TOF MS spectra of whole-cell extracts of *B. melitensis*, *B. suis*, and *B. abortus*. Three strains for each species are shown.

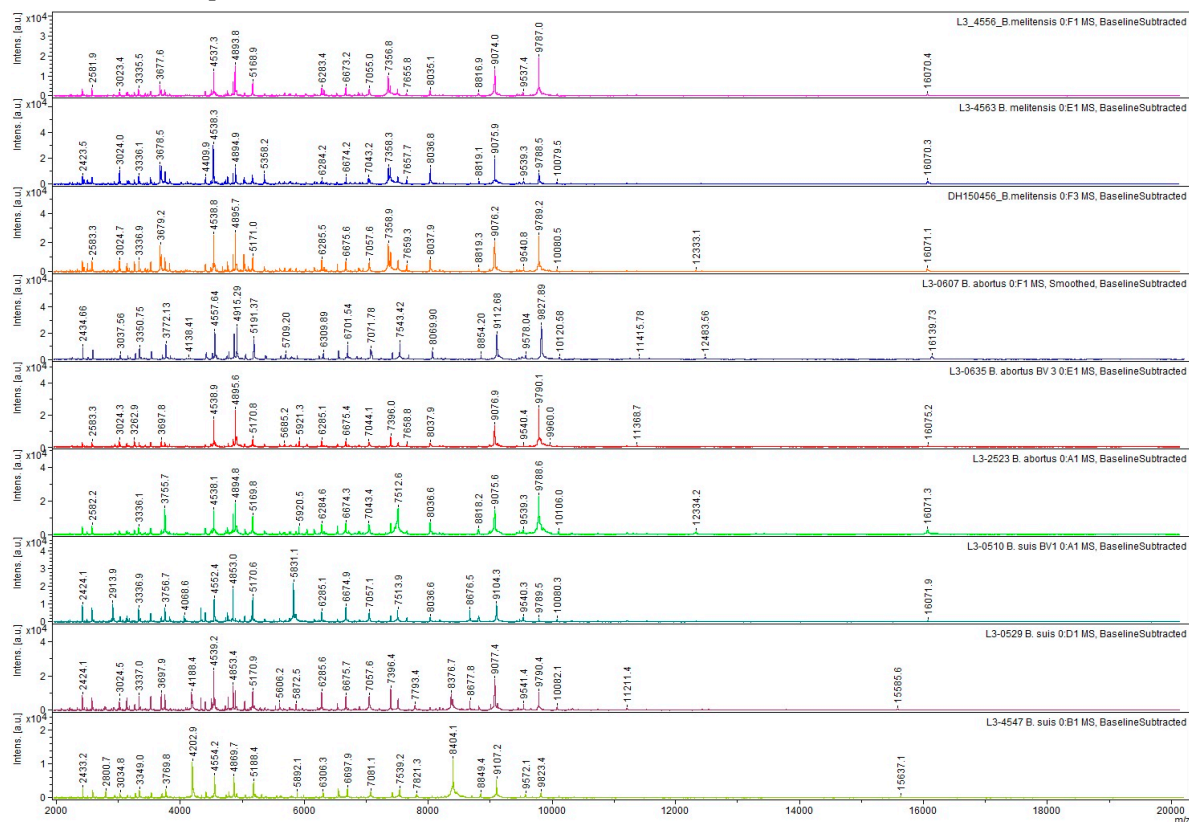

Supplement: s1 [file s1]
