# Supplementary material for: Machine Learning Algorithms for Classification of MALDI-TOF MS Spectra from Phylogenetically Closely Related Species Brucella melitensis, Brucella abortus and Brucella suis
Source: MDPI journal article supplement (doi:10.3390/microorganisms10081658), 2022-08-17

**Figure S7:** The graph illustrates the performance of the different NN classifiers over the hyperparameter grid. (a) NN classifiers' fit on the top four most important features, displaying best performance with size = 2 and decay = 0.5. (b) NN classifiers modeled on the top three most important features, showing best performance with size = 3 and decay = 0.

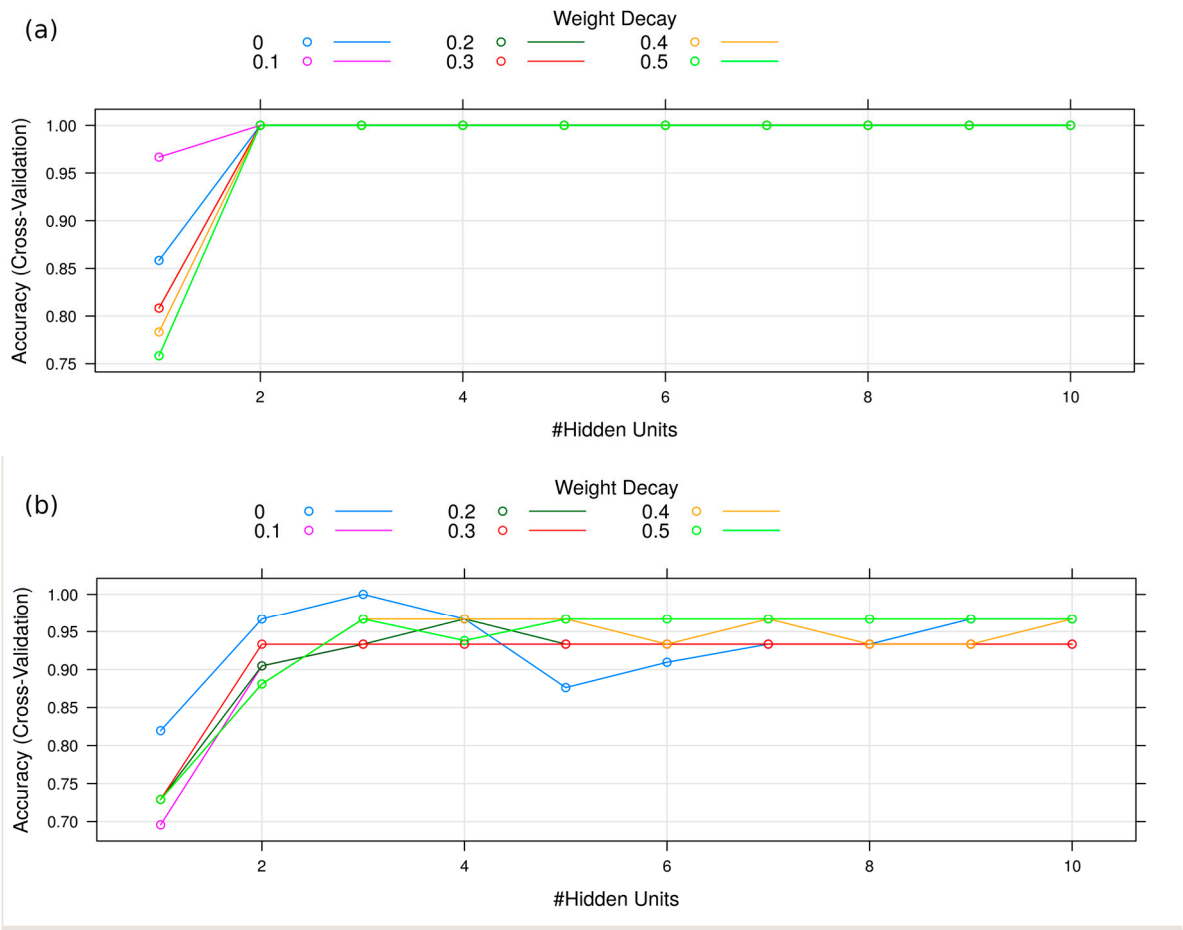

Supplement: s1 [file s1]
