# Supplementary material for: Machine Learning Algorithms for Classification of MALDI-TOF MS Spectra from Phylogenetically Closely Related Species Brucella melitensis, Brucella abortus and Brucella suis
Source: MDPI journal article supplement (doi:10.3390/microorganisms10081658), 2022-08-17

**Figure S4:** Average silhouette coefficient vs. HAC model. Silhouette coefficient (SC) over a range of possible number of clusters ( $k$ ). SC is maximized for  $k = 3$  and  $k = 4$ . Since  $k = 3$  is concordant with the metadata, this HAC model was preferred.

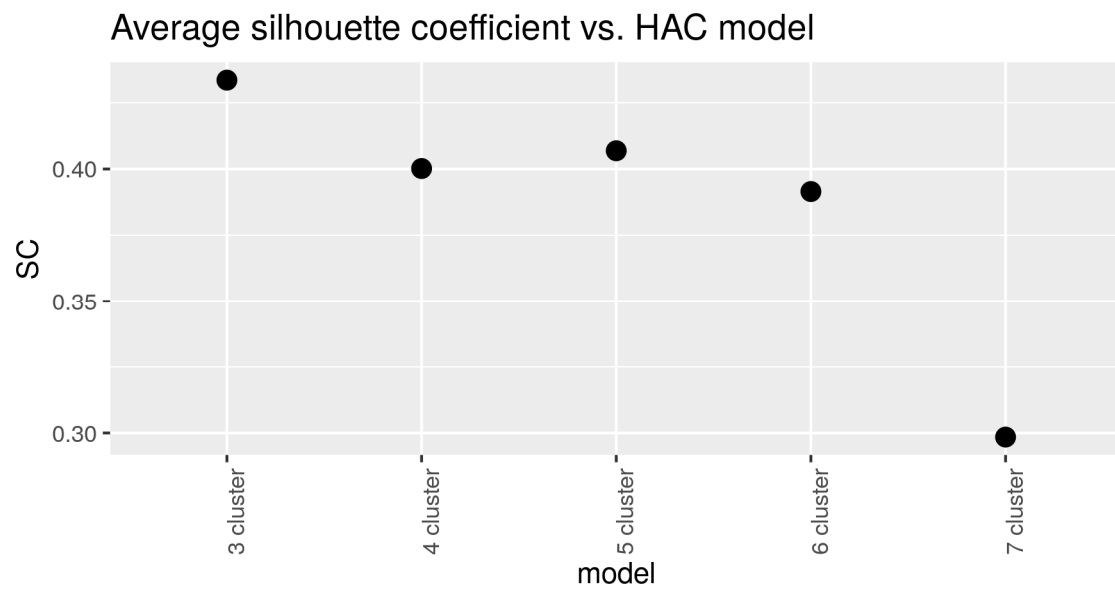

Supplement: s1 [file s1]
