# Supplementary material for: Machine Learning Algorithms for Classification of MALDI-TOF MS Spectra from Phylogenetically Closely Related Species Brucella melitensis, Brucella abortus and Brucella suis
Source: MDPI journal article supplement (doi:10.3390/microorganisms10081658), 2022-08-17

**Figure S6:** Hierarchical agglomerative clustering tree based on MALDI-TOF MS data (16 features). Percentages of bootstrapping replicates supporting the location of individual nodes are indicated.

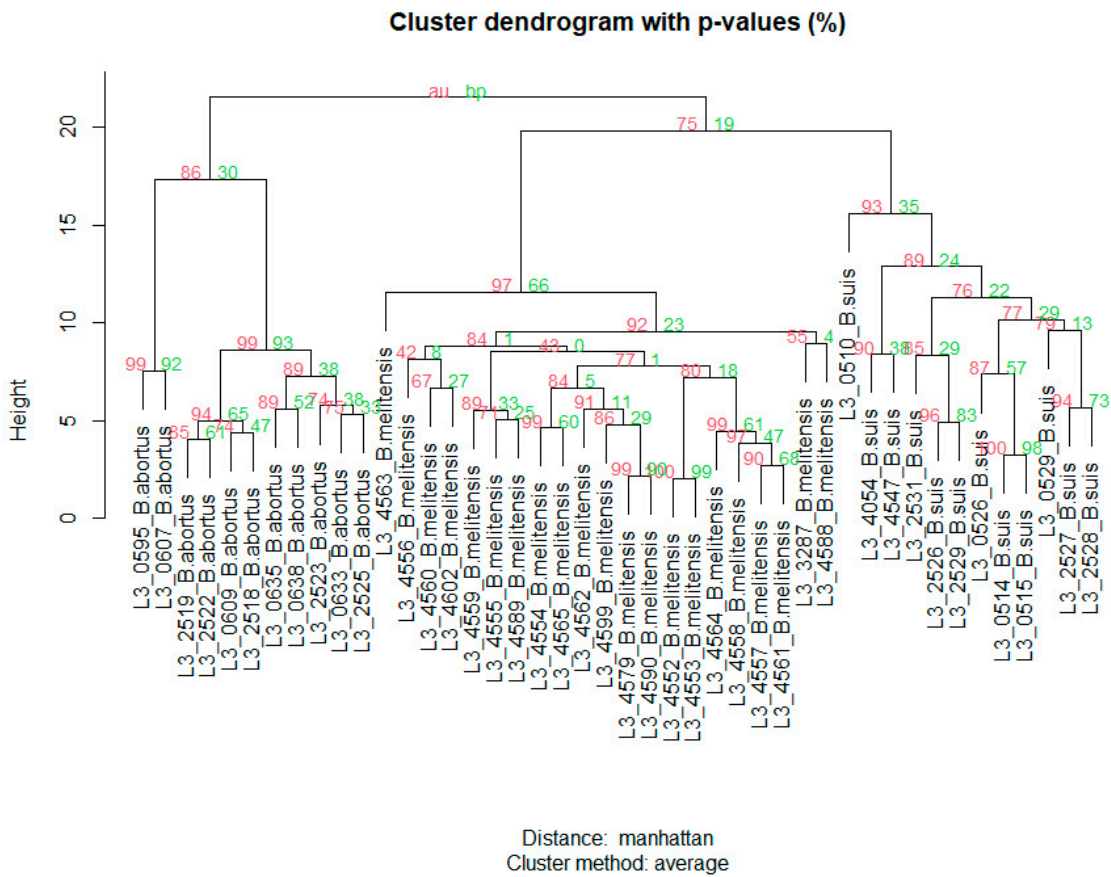

Supplement: s1 [file s1]
