# Supplementary material for: Machine Learning Algorithms for Classification of MALDI-TOF MS Spectra from Phylogenetically Closely Related Species Brucella melitensis, Brucella abortus and Brucella suis
Source: Microorganisms. 2022 Aug 17;10(8):1658. doi: 10.3390/microorganisms10081658 (PMC9416640; doi:10.3390/microorganisms10081658)
Supplement: Supplementary file 1 [file microorganisms-10-01658-s001.zip › File_S1.csv]

ID	Peak.1982	Peak.1991	Peak.1999	Peak.2006	Peak.2014	Peak.2023	Peak.2032	Peak.2046	Peak.2057	Peak.2065	Peak.2076	Peak.2093	Peak.2103	Peak.2112	Peak.2121	Peak.2131	Peak.2139	Peak.2148	Peak.2156	Peak.2166	Peak.2175	Peak.2186	Peak.2194	Peak.2205	Peak.2222	Peak.2234	Peak.2241	Peak.2250	Peak.2258	Peak.2267	Peak.2274	Peak.2287	Peak.2301	Peak.2313	Peak.2327	Peak.2348	Peak.2362	Peak.2373	Peak.2383	Peak.2391	Peak.2400	Peak.2406	Peak.2424	Peak.2435	Peak.2444	Peak.2451	Peak.2463	Peak.2473	Peak.2479
L3_0510_B__suis_BV1	3.06584066996314e-05	2.58043744570845e-05	4.83617117942713e-05	0.000105786899175595	4.25831743512041e-05	3.32171701301463e-05	0.000165319868329799	2.42983412995112e-05	1.99996416998241e-05	5.33091786987305e-05	6.19369430586717e-05	0.000141799442089642	8.82809021617252e-05	5.8312423420564e-05	5.08538172746424e-05	4.81739443387855e-05	8.52948431457385e-05	0.000128322326383754	2.20910054105737e-05	4.04690939959091e-05	9.10952933764178e-05	4.31720507747088e-05	7.54674382989187e-05	7.38352384206441e-05	0.000374048694497283	7.9690438215597e-05	9.74477029037479e-05	0.000101813270215132	8.82045337282544e-05	1.2157062238857e-05	7.10321415416665e-05	6.4645630130816e-05	6.92821262793507e-05	4.03131372774879e-05	2.7046110430457e-05	0.000276787885769689	9.48548687046628e-05	2.67751980376417e-05	8.819859541454e-05	0.000130231900175188	2.82631150848483e-05	4.35737209975149e-05	0.00162711009707138	0.000270481494439947	0.000113104117356441	7.03363035191276e-06	0.000109735602618052	3.59623945987026e-05	0.000172908270916523
L3_0514_B__suis	5.20829200568659e-05	2.33631472918371e-05	7.8633573237533e-05	4.56390287303168e-05	6.40408134043193e-05	4.41676664074599e-05	3.54526563627884e-05	3.51091628863391e-05	2.68331495624756e-05	4.21212828540221e-05	4.42915494747948e-05	0.000145978217197185	4.52550889301403e-05	3.71818994634428e-05	4.9947871318719e-05	3.40523342225139e-05	5.4399902942658e-05	2.63264956288867e-05	2.02189396968069e-05	3.01775017944505e-05	6.238662120479e-05	5.25729347919251e-05	3.78858497524624e-05	6.27234874891406e-05	0.000137952647078072	2.26316877821088e-05	0.000191601768745172	0.000146840577928872	8.45584317254219e-05	0.000110934687160527	1.26929524691051e-05	7.49577386969236e-05	0.000107318302691908	3.58654837201936e-05	3.37371702103353e-05	0.000184748799776029	3.88488435510633e-05	3.94890213320197e-05	7.48457890780434e-05	9.89098178089404e-05	2.86303404001559e-05	2.81553908179643e-05	0.000684236867045152	0.000107491365583706	0.000114777367573408	2.13372139799404e-05	0.000175181453507482	3.4244355047647e-05	4.77508201437764e-05
L3_0515_B__suis	5.46671560420624e-05	2.18104101718037e-05	8.36254048123083e-05	3.66669498858679e-05	6.82880110766102e-05	3.46141189114969e-05	2.44065989457186e-05	3.86045690059435e-05	2.62077850669343e-05	5.62488546015901e-05	3.5401078913291e-05	0.000137249949099878	4.41927962141149e-05	2.69276882725782e-05	2.96161530786004e-05	3.3772002094694e-05	3.9231654049358e-05	2.49805767564666e-05	3.16301396792008e-05	2.98506014828871e-05	6.9566891483862e-05	5.54080077342511e-05	5.61123650829756e-05	5.02468289312319e-05	0.00014830225015065	2.52281469308055e-05	0.000171244291441	0.00012814843046465	8.17885058615805e-05	0.000117131367823277	1.57426421177316e-05	5.62284247847103e-05	0.000229481228369545	3.95380598497104e-05	3.13614663488557e-05	0.000208196803296289	4.7615454389162e-05	2.57541226406718e-05	7.03968412125801e-05	7.97019661515377e-05	3.98302408674077e-05	3.20715904226177e-05	0.000752310754723475	0.000120132743854527	0.000129382745953283	2.06354954789331e-05	0.000251886399051149	4.14251941758296e-05	5.26475809376032e-05
L3_0526_B__suis	4.46107115232338e-05	2.27286080359477e-05	9.29713329028104e-05	5.13302998973774e-05	6.41922613699657e-05	3.26452801147355e-05	3.63324131361611e-05	3.53199879837658e-05	3.03782534984347e-05	5.41794508051908e-05	3.4547313033824e-05	0.000133866382756566	5.39781415845414e-05	4.82177889763161e-05	3.8887496567195e-05	3.29167258276106e-05	3.20039213534567e-05	3.63747021279352e-05	4.70393460171837e-05	3.32267681845109e-05	8.23892238571642e-05	0.000100024932285419	4.96830183505435e-05	5.58719144235582e-05	0.00020157594704055	3.26691950012196e-05	0.000148130113751252	9.20122517831607e-05	7.14262079465356e-05	9.5100718705781e-05	1.76313439530563e-05	7.12818490604223e-05	6.88895826027657e-05	3.05085690008367e-05	4.05409819952356e-05	0.000245387763248072	5.53559390691972e-05	2.75615342362662e-05	7.66284075475409e-05	3.14250009939517e-05	3.438888041985e-05	3.48523638323778e-05	0.000988189630789437	0.00021161205954755	0.000160388027593326	2.30788642669212e-05	0.000174514516193328	2.7682324028636e-05	2.98949070596136e-05
L3_0529_B__suis	2.79126932000331e-05	1.9278490036719e-05	5.65510635591724e-05	5.94997299863557e-05	3.39905872453046e-05	4.30305386996387e-05	1.52049086384347e-05	6.48311822673013e-05	3.33762965234064e-05	4.42503804211642e-05	3.40752916185127e-05	0.000159618807021977	4.8788542011662e-05	2.32569323712335e-05	5.91540868229715e-05	2.19360834830433e-05	2.49163976905871e-05	2.13735602262607e-05	4.91316065605363e-05	2.91492880738413e-05	5.900556123535e-05	7.97425531657538e-05	7.17334181181916e-05	4.07182101743969e-05	0.000174677566602284	3.5567746273918e-05	0.00016819188275953	0.00011295959872093	5.80349939627344e-05	7.9833858683569e-05	1.02507110049894e-05	4.7774305641464e-05	5.52577361692631e-05	3.04318269268075e-05	2.24944504786494e-05	0.000262111628856001	5.43939815618946e-05	1.82440804950281e-05	8.55925530558511e-05	5.11898251283281e-05	2.61307789659195e-05	4.59469371189168e-05	0.000928503045836002	0.000155110215113804	0.000114736505684126	1.02064379375777e-05	0.000190269260842471	2.72000557068193e-05	4.52709078627409e-05
L3_0595_B__abortus	4.69138884423176e-05	1.79607770424478e-05	3.18982845896331e-05	1.45850752295252e-05	4.5557618990724e-05	5.163187783225e-05	2.35172423798559e-05	3.7761851403578e-05	1.90656200470459e-05	1.33764044466986e-05	2.28565096438702e-05	2.75643799687669e-05	8.29307156723887e-05	5.68650650715788e-05	2.67836850597171e-05	3.16606713041327e-05	1.44833370912446e-05	1.93044504076827e-05	1.64192392691396e-05	3.19743428526439e-05	1.30783670417004e-05	6.72708629802184e-05	6.40504948481918e-05	8.02238803262428e-05	2.08876914683215e-05	0.000233460550398362	6.02220054803172e-05	3.85581925280058e-05	5.11323636005374e-05	0.000111601766029102	4.1423133734096e-05	1.34272215260748e-05	8.33791244923038e-05	4.95818248807146e-05	3.15449361500427e-05	1.54940504963116e-05	0.000213560974590941	4.5185429115353e-05	2.8946286853322e-05	2.4527266993774e-05	6.38934498013282e-05	2.23530951409722e-05	1.78569157714161e-05	0.00109876543580025	0.000218982784662378	0.000123096179423904	6.81656957067572e-05	4.43224223881049e-05	9.03751911395882e-05
L3_0607_B__abortus	1.41131650612354e-05	2.52938354487441e-05	1.89982528311775e-05	1.300475260823e-05	5.75490441540653e-05	4.13819083814026e-05	1.61092565386065e-05	7.031199939027e-05	2.50699306578093e-05	2.78826368008068e-05	2.52632663713615e-05	4.30382020195915e-05	6.86066272291596e-05	4.46656094336814e-05	1.99909944642225e-05	2.88323304335937e-05	1.77010857467173e-05	3.1037193494744e-05	8.69015994491509e-06	3.16730592540716e-05	1.02896174723497e-05	9.91259340985362e-05	5.34118197630971e-05	7.10726175800234e-05	2.25606255540403e-05	0.000237449128015235	4.62166805547458e-05	0.000103298028789996	4.81352053706686e-05	6.52609982901658e-05	6.73767133420335e-05	1.86186305309889e-05	0.000136850741536679	4.72782470032473e-05	2.01358818178541e-05	1.37982264042318e-05	0.000209368757498204	3.59312179108657e-05	1.34137313790097e-05	1.30906700028496e-05	6.79293688807499e-05	1.12192449392838e-05	1.3848699339363e-05	0.00113929115266531	0.000140679008956943	0.000105980259668339	1.3310248292823e-05	4.44457729115976e-05	8.98546359320489e-05
L3_0609_B__abortus	1.80860840244921e-05	2.41589433252772e-05	4.03589137472329e-05	6.53487611700422e-05	3.50591032325266e-05	5.27286445196449e-05	2.8541899768669e-05	3.90031102230324e-05	2.20511351780696e-05	3.71663400622418e-05	6.78622374498762e-05	0.000113136208126903	5.85374045100594e-05	2.85878252582172e-05	4.29405550014361e-05	4.02758818364994e-05	3.45095206629688e-05	2.52920784126252e-05	4.10297696390313e-05	2.2742938732148e-05	7.36364606873105e-05	7.46162666852987e-05	4.83955445288074e-05	4.70705192625331e-05	0.000203082358815606	3.72325006536792e-05	0.000111914903113304	0.00039312911584928	9.49505109709062e-05	5.55136576701173e-05	1.1532627143829e-05	0.000159086888535996	3.54060537232005e-05	3.55355941414702e-05	2.90435841157998e-05	0.000205677094221747	3.768106571042e-05	5.10331717375826e-05	8.56316454510024e-05	1.74761667897973e-05	3.02991839954475e-05	4.05450712154842e-05	0.0010509116227934	0.000138352288969671	0.000128550728173264	6.74313425203509e-06	9.65062021776935e-05	2.67216992827717e-05	1.17753992037308e-05
L3_0633_B__abortus	2.89361427344964e-05	3.20899112963742e-05	3.52027454153615e-05	5.6131041076346e-05	4.30233542519885e-05	2.52662247825711e-05	4.16975152535063e-05	4.03407535064186e-05	3.00356464014613e-05	5.17289364424669e-05	4.31466465633997e-05	0.00010285976309724	5.62704960255548e-05	2.2818497940929e-05	3.69209199392497e-05	3.23869998905051e-05	2.6424285997885e-05	4.88190304155895e-05	1.96559485999945e-05	2.35356225387746e-05	8.82479539576409e-05	6.02761463261556e-05	6.83145470003767e-05	6.42490722761406e-05	0.000195088680369917	2.551843514937e-05	0.000122851820156189	0.000278892491767638	8.39287221867669e-05	6.13855646357586e-05	2.11035720697701e-05	0.000158100804606943	5.82628913131035e-05	3.24783697895339e-05	2.34361343982036e-05	0.000187166897092152	5.72824044356852e-05	3.1680601187846e-05	6.80409132346995e-05	2.03925428287337e-05	3.19108430881927e-05	3.76910020387001e-05	0.000950493786306506	0.000122995229977325	0.000167239332554203	1.66647907786933e-05	0.000131851356552062	2.74367759234691e-05	2.13026629809959e-05
L3_0635_B__abortus_BV_3	4.60514811784477e-05	1.94989569700694e-05	8.05709269778264e-05	4.84698362040012e-05	7.87957079815912e-05	3.11604158603786e-05	3.88450885327957e-05	3.73019627472724e-05	3.28041093855706e-05	4.27352198646577e-05	4.10795811946095e-05	0.000111506225579468	4.45096518033588e-05	3.49904839189973e-05	4.29254894522401e-05	4.17865814278776e-05	3.43673749892443e-05	3.67971039274236e-05	3.16155393465394e-05	2.38327520472044e-05	8.0375801154156e-05	5.79274750554455e-05	4.82245467965058e-05	4.91022584824896e-05	0.000138570449988445	2.379304994601e-05	0.000157277395619553	0.000120997540451662	0.000105435300691966	0.000117981873808201	1.59243010168146e-05	8.2781304154008e-05	9.14937474609346e-05	4.17847044268597e-05	3.06556929856074e-05	0.000187052463308271	5.71838950529063e-05	2.90771741351616e-05	6.61675961001066e-05	3.03643123598326e-05	3.82989588161617e-05	3.83717693825221e-05	0.000692405199698033	0.000128252832981142	0.00017710343968859	3.19842450407124e-05	0.000182342195006248	3.09908015576956e-05	2.72100861576318e-05
L3_0638_B__abortus_BV1	3.53960380547914e-05	3.76552113693148e-05	4.62108830942606e-05	7.95318128788403e-05	5.59624236077549e-05	4.18745016714188e-05	5.75289327132511e-05	3.8634634110342e-05	2.13040347069271e-05	4.81384381149647e-05	5.84058440979258e-05	0.000124400148626512	6.72480802544301e-05	3.69667466929584e-05	4.10881019133091e-05	4.81324070834888e-05	2.52949924371516e-05	5.1137710357124e-05	2.50090179177614e-05	2.2194909184824e-05	0.00012164799664353	8.2405024535353e-05	7.91002590267463e-05	7.92157706063751e-05	0.000340152904920967	4.02609768925574e-05	0.000192400350223241	0.000385330155380711	0.000127083152900251	9.65277337206464e-05	1.54564969969844e-05	0.000195944098078035	6.73917000717656e-05	4.44785733911834e-05	2.20173341853304e-05	0.000213656373243046	6.47989742102293e-05	3.33668015693987e-05	8.34170931310168e-05	1.91094552888189e-05	4.18675937887925e-05	3.44355406228531e-05	0.00136965522968577	0.00020950882447788	0.000198227128464854	1.5472094465523e-05	0.000124140891935279	2.23074571454808e-05	2.14583035869355e-05
L3_2518_B__abortus_BV_2	5.1481953028688e-05	3.25415366063045e-05	1.81827696746922e-05	8.34342299076773e-05	2.96451931492286e-05	4.13192671265647e-05	3.78477121492196e-05	3.66324641546013e-05	1.91513374818824e-05	3.97662224129478e-05	4.54604935298341e-05	8.60536038698038e-05	6.45591754107371e-05	2.16916147517852e-05	4.495785002605e-05	3.96440031080842e-05	3.05047899797877e-05	4.18105666201279e-05	3.61717418387584e-05	2.57650434481365e-05	5.73564031951504e-05	5.09122933598299e-05	5.55504726820791e-05	4.54775110559519e-05	0.000165899707056203	2.10413330908702e-05	8.10223538736142e-05	0.000259584619860021	0.000119711528096496	5.19465390041218e-05	2.95414464546918e-05	0.000134030202844807	5.88284726072097e-05	3.41519713708691e-05	2.78705752765361e-05	0.000158725825247868	3.89326142473404e-05	2.6433545127343e-05	5.21887538715414e-05	1.65738520164969e-05	2.68646052360457e-05	4.15951704908761e-05	0.000996859263865238	0.000151405893504084	8.45754102480289e-05	1.4105886865624e-05	6.78597797880719e-05	1.41115445193217e-05	2.11318804341932e-05
L3_2519_B__abortus	3.50525436068157e-05	3.39335849757349e-05	1.867737955846e-05	7.50751512903433e-05	2.84318252493077e-05	3.8812453982108e-05	3.57800762096509e-05	3.4927814838002e-05	2.11876874746541e-05	2.77475412302192e-05	6.73343444140181e-05	0.000103252201825634	6.15455402104824e-05	1.89458387369943e-05	3.8178866642024e-05	4.37248895753303e-05	3.9143772030201e-05	4.19394203587955e-05	2.48944261163567e-05	2.9672079636741e-05	6.45745872331829e-05	5.52756642115598e-05	5.4222384605006e-05	5.19007366509651e-05	0.000190631198799426	2.4870055463271e-05	8.23161742362874e-05	0.000321288454276599	0.000144914024328841	5.17106384156833e-05	1.7594429335379e-05	0.000145816584931536	0.000108271647975466	3.31614025483123e-05	2.08754753739484e-05	0.000177454942051097	4.15035461430666e-05	2.96693323834397e-05	7.76669652089654e-05	2.31216787007882e-05	2.82867704216173e-05	5.2845472109854e-05	0.00109697212218235	0.000173904310730597	0.000102570383848008	4.53760789406857e-06	8.17517585195554e-05	1.68937463580692e-05	2.26856326421994e-05
L3_2522_B__abortus	3.32427730763554e-05	3.94707961056605e-05	3.26169228648069e-05	7.13831155483149e-05	3.79262427925101e-05	5.8237732803328e-05	4.33931374793472e-05	3.28893353865082e-05	2.62510012236832e-05	3.94783444142499e-05	4.72568051654893e-05	8.16899609504615e-05	5.89908138615076e-05	3.99130301487934e-05	3.45511612051887e-05	3.72006622919171e-05	4.92296175412234e-05	4.46893650822036e-05	4.51982959959546e-05	2.76273570663134e-05	7.42323756165876e-05	5.48987230112811e-05	5.79678677021449e-05	4.52663640850493e-05	0.000143009215548813	2.32355177920237e-05	0.000117492383229521	0.000249272051891884	8.37874368733927e-05	4.35527845195141e-05	2.43611811202884e-05	0.00011894186584432	5.04492745848022e-05	3.86335082484479e-05	3.03043147322037e-05	0.000151806653881805	6.06366027117166e-05	2.90152559541877e-05	5.75878139387153e-05	2.92213921825762e-05	4.71546206751839e-05	4.61668736744681e-05	0.000869809549600302	0.000118369391785617	0.000108479266998968	1.83057660642145e-05	8.56463446673394e-05	4.07810637625656e-05	3.4137444004205e-05
L3_2523_B__abortus	2.26051139680071e-05	3.46266945696061e-05	2.50163676979747e-05	6.00546019103578e-05	3.3586311911609e-05	3.7240141406292e-05	3.60866452233139e-05	2.852306205005e-05	1.93335332019607e-05	4.33608343275669e-05	2.06802852158565e-05	8.19384482196516e-05	5.11080055904899e-05	2.30342314397614e-05	3.0493402333692e-05	3.68684763075183e-05	2.72865254592591e-05	3.121418148203e-05	2.43272144571102e-05	2.49162635219919e-05	7.14601179386962e-05	3.48167669749683e-05	6.73048609191017e-05	5.3548973416475e-05	0.000154795238479348	2.02673146661505e-05	0.000142110342542958	0.000124927988156086	5.69372341599085e-05	4.29165534411373e-05	1.62065801331792e-05	8.15574698297607e-05	5.66099810964408e-05	2.80790353302301e-05	2.4446635003337e-05	0.000142053994646478	6.31141874211624e-05	3.62556922514278e-05	5.08491047336952e-05	2.00886507873382e-05	2.10097138435584e-05	2.64394666506197e-05	0.000841068093861212	0.000110830379364963	9.44599630810644e-05	1.42273024751646e-05	9.95097602250237e-05	2.23958605000366e-05	1.79091713817468e-05
L3_2525_B__abortus	3.87845514279439e-05	2.89356848281522e-05	2.97895564332115e-05	6.49777750976964e-05	3.89383593400605e-05	3.67919856840902e-05	5.06423622275962e-05	2.99317835665081e-05	2.14487531736173e-05	6.57021622425033e-05	3.87300642724508e-05	8.43515563056799e-05	5.3952133188786e-05	2.57144114839402e-05	4.35018991816966e-05	3.74140651119765e-05	2.79991681959847e-05	4.31553654094241e-05	3.27803954959123e-05	2.43270414446346e-05	8.15849999332296e-05	4.73522941316073e-05	6.68677652247538e-05	5.80040055411609e-05	0.000157405170529966	2.02808592388887e-05	0.000103909384902475	0.000137734730838215	7.17469744200668e-05	4.90042569688068e-05	1.97658948677286e-05	7.89091536150362e-05	6.03062003281954e-05	2.85254157309401e-05	2.87917984816285e-05	0.000160620594513725	4.15274783925794e-05	1.97992340489586e-05	5.54577479889023e-05	3.65885790126388e-05	2.80702138543034e-05	3.27199963231475e-05	0.000828135021380009	0.000114848675340388	0.000128915362227585	1.37452945988923e-05	0.00012920902170767	1.71090075982996e-05	1.9203634312877e-05
L3_2526_B_suis	4.72158095531302e-05	1.70619956653825e-05	7.13301872295842e-05	4.79063973772697e-05	6.16857985145214e-05	4.15260154304972e-05	4.65561811737036e-05	4.91142614875426e-05	3.30883705267825e-05	3.98585041960419e-05	3.96394630777226e-05	8.0337781422363e-05	8.70434095091462e-05	2.33758668088665e-05	3.77569603668189e-05	3.07330853579079e-05	3.39173552766839e-05	5.37369099955778e-05	2.49515944575715e-05	2.17825586734342e-05	6.27061318036256e-05	3.74936186022019e-05	0.000146922322233755	7.18526436937623e-05	0.000175660689804133	3.01438132776581e-05	0.000127856033862763	9.20422955373245e-05	8.25748597186072e-05	1.06931857937266e-05	3.45932725334412e-05	9.15048323208486e-05	5.95536401585493e-05	5.05088674467748e-05	2.21180496139852e-05	0.000149156047101323	8.45397329119802e-05	2.21941812094826e-05	4.8643068931177e-05	3.36975292080934e-05	4.95790223587541e-05	3.7604842420109e-05	0.000996307186664239	0.000142275080619894	9.11048134894281e-05	1.07361739157004e-05	7.26435521294023e-05	2.94984105140464e-05	6.27885828253973e-05
L3_2527_B_suis	5.57006702531807e-05	3.32591949753497e-05	4.52010771625019e-05	8.4198326803075e-05	6.66616141441097e-05	4.01047487678009e-05	5.49174081799836e-05	5.52418286873904e-05	2.17505595087857e-05	6.57321999502004e-05	5.46900089650398e-05	0.000182351791337829	7.53928912454351e-05	3.33752278201188e-05	3.87913029057697e-05	6.44872191946381e-05	7.3706466190814e-05	6.15491994280814e-05	2.745566224446e-05	2.88398667682498e-05	8.65231133323823e-05	7.87071493891626e-05	7.86291635164151e-05	7.08644121615521e-05	0.000175752473548066	2.62228538374348e-05	0.000237305122556758	0.000242582421432241	0.000134087284721144	4.36437449463096e-05	5.67079651626457e-06	0.00011496648432384	0.000393466420619668	2.97623079274321e-05	3.33526301911856e-05	0.000136218775542117	5.31411817458611e-05	5.84595932773836e-05	6.66243181121361e-05	0.000123326290691556	4.54817514951513e-05	3.83191283047863e-05	0.000972447246482684	0.000149241617275328	0.000106825168890405	2.37429700008193e-05	9.4591424037576e-05	3.17716765169041e-05	6.75628636934477e-05
L3_2528_B_suis	6.71836375263827e-05	2.85474095743994e-05	7.01429190572835e-05	4.08429926628197e-05	8.16088614560041e-05	2.26111145968795e-05	4.39339375589692e-05	3.75593600488192e-05	2.96137614614075e-05	3.95822536278277e-05	3.29561559255688e-05	0.000207794279976559	6.31226322459963e-05	3.74301148872236e-05	3.23993910654641e-05	3.1704759258324e-05	4.99911486448899e-05	3.75783353402431e-05	2.4796570432629e-05	2.10909819442757e-05	7.76679992655644e-05	5.95614012028638e-05	5.53434658597475e-05	6.04149428157454e-05	0.000189939326138286	2.69793703666091e-05	0.000211629338565956	0.000153819062640302	6.26861982598893e-05	9.45073851026771e-05	1.24126672087301e-05	8.0084686818526e-05	0.000148866694965297	3.97024908827556e-05	4.92868287782515e-05	0.000178507944098836	4.10073533994071e-05	3.29603418263826e-05	6.49483370771597e-05	0.000108660851149905	3.40795180090544e-05	4.57300103250899e-05	0.000813394924828817	0.000126627127756662	8.54217774793659e-05	1.69387915134289e-05	0.000159598414822025	4.30414788725172e-05	6.56948594325594e-05
L3_2529_B_suis	0.000101248251012973	2.26401123390384e-05	0.00010610985249451	3.67193757352254e-05	7.28168794025738e-05	3.70037076091606e-05	3.95666438663528e-05	3.86579460928551e-05	2.08523527580558e-05	4.31415492744366e-05	2.39607448360144e-05	0.000112532498171226	4.76034330573533e-05	2.86833494840858e-05	2.09921993645708e-05	3.66310573585189e-05	3.65732190649898e-05	3.65531951293357e-05	3.73008575102699e-05	2.72246386060474e-05	6.72623745403796e-05	2.38175413062015e-05	7.5853327455859e-05	5.92675684550979e-05	0.000235454532810696	4.05453798678591e-05	0.000140205025949426	5.82019673793297e-05	7.33797539367176e-05	1.2185469500057e-05	7.70178887155241e-05	6.74698832587015e-05	4.89478413173562e-05	6.2069981628309e-05	3.13839787371269e-05	0.000213231836408269	5.56818432765574e-05	2.44343791173668e-05	7.24104545884859e-05	3.59538106483935e-05	2.83319267199711e-05	6.2247317427492e-05	0.00107214959883061	0.000187313940601485	0.000153255827804993	1.75656538929321e-05	0.000106842863106436	3.7640982343813e-05	3.29539951374166e-05
L3_2531_B__suis_BV5	1.86361755000699e-05	4.72003991678029e-05	5.34549989811543e-05	8.56666907399997e-05	6.74780392292367e-05	3.8679796332465e-05	4.83619617357555e-05	6.47764925040826e-05	3.12835530841233e-05	4.48152837180063e-05	3.18358122207505e-05	0.00010585261352475	0.000130319427913674	2.97427082080726e-05	2.90502805588503e-05	4.17855304206868e-05	3.33896842698455e-05	2.48880064018186e-05	4.23316475889572e-05	4.23268671126386e-05	0.00010826612759712	5.06313699620574e-05	7.39279125250143e-05	3.3653532869358e-05	0.000194082445328661	6.25017674823221e-05	0.00010170822804415	2.56138794096724e-05	4.80676496302775e-05	0.0002036550872876	6.26411460965988e-05	4.4336769119152e-05	0.000147598354489457	2.87716043462865e-05	4.16315076427655e-05	0.000135310770240595	4.21993077791784e-05	6.50889923996714e-05	5.71746728427153e-05	2.6717556525962e-05	3.72115724179178e-05	4.19333638357809e-05	0.00112616019433471	0.000142019836321751	6.4863992124555e-05	1.44329471644371e-05	6.41089499775618e-05	1.27590731128787e-05	5.12413360612257e-05
L3_3287_B__melitensis	4.69140324703974e-05	4.25754009931851e-05	5.31307989923961e-05	6.29040075336562e-05	4.77692018773021e-05	2.69389039686285e-05	3.33930651353637e-05	3.12501859429051e-05	3.16621412243235e-05	9.89821201044933e-05	4.35079561256896e-05	9.56613548293227e-05	0.000101156094014177	3.63208473666206e-05	3.68970664503827e-05	3.42113826177718e-05	2.45631329566474e-05	3.53151758152183e-05	2.01297590959256e-05	3.20674280113548e-05	8.71960869058434e-05	4.7545007027305e-05	8.05608471288987e-05	6.55692964185998e-05	0.000200205877590603	4.50117522990887e-05	9.16708825785778e-05	0.000490750188555046	0.000123862281465742	9.45710242460664e-05	1.22792596394005e-05	0.000201044557844184	4.19736837484005e-05	4.51380781087508e-05	7.79048444003222e-05	0.000206373403804246	3.5794984011927e-05	2.85415396285813e-05	8.30601426690241e-05	2.64999639123472e-05	3.80190553341181e-05	1.74462034870816e-05	0.000891095884261258	0.000109529731267748	0.00035535824493147	6.0711859955976e-05	0.000182222768091365	4.09782299037811e-05	9.80995821224195e-06
L3_4054_B__suis	2.78663307063821e-05	4.37313086036745e-05	3.81667490476239e-05	3.09182425793312e-05	3.62136041598428e-05	5.50016429069152e-05	3.77233445869735e-05	5.09832035222928e-05	2.98064061219193e-05	1.67958673567023e-05	3.47715301878706e-05	3.42083380161846e-05	6.7477754764909e-05	3.5231365496072e-05	3.04666323135783e-05	4.52612268734357e-05	2.2690810333506e-05	4.39589969741063e-05	2.57322119115314e-05	5.80990072531784e-05	2.71048688479081e-05	5.2287617875764e-05	6.38956995170377e-05	9.0317167455662e-05	7.65776860003759e-05	0.000192579906506622	8.86363201907332e-05	5.43622625755899e-05	8.02904695817509e-05	5.44197770714283e-05	6.09924224796315e-05	6.78505153856663e-05	0.000184745834201225	0.000111247450543974	3.615960058204e-05	3.82457857283869e-05	7.18381053490941e-05	5.27077383551878e-05	4.61400780915426e-05	1.72929627464801e-05	6.49639100196619e-05	2.68307809515294e-05	0.000349972124250904	0.000949326444931219	0.000118361441515462	0.000109493172707627	4.26140439304133e-05	2.87777376482776e-05	8.74647523977409e-05
L3_4547_B__suis	2.69942459697022e-05	3.91629714162773e-05	3.337215401159e-05	2.62573920023421e-05	3.92473527676073e-05	3.27025364962722e-05	2.38410289471684e-05	2.94165475696323e-05	2.13092453887764e-05	3.08862820679413e-05	3.68994594701267e-05	1.74262348880215e-05	0.000102850207068089	4.11441154370905e-05	3.33750499382042e-05	5.11963579357662e-05	2.30361663787713e-05	3.90691024120923e-05	4.62148871722913e-05	2.72868567378928e-05	2.50376487980224e-05	7.41579027326567e-05	4.87131665794688e-05	4.94511141430179e-05	4.19333495719039e-05	8.85408997946912e-05	3.40085561485434e-05	0.000101586913886941	6.834671107448e-05	6.82851561709758e-05	6.04305731458606e-05	2.36266196480773e-05	3.23745082601852e-05	9.81941288850995e-05	1.85036280652129e-05	3.36395609359901e-05	8.48651549395415e-05	3.09282005589746e-05	3.26684245910308e-05	5.51319731984305e-05	5.91465349745076e-05	2.10687320763006e-05	4.98375188261119e-05	0.00088231348109567	0.0001347385571729	8.04161457519472e-05	3.71710547691721e-05	6.86506378509255e-05	4.17717276729928e-05
L3_4552_B_melitensis	2.77638379812011e-05	3.50406877343833e-05	4.65825241711928e-05	6.93623923354861e-05	4.59272757279457e-05	3.6062530762341e-05	4.2833068457817e-05	3.95531723599214e-05	3.63844144019824e-05	4.56028069586056e-05	7.22614606859843e-05	5.93236446531991e-05	8.5821246423925e-05	3.45886151918346e-05	4.72311094917799e-05	4.62504508015472e-05	3.92630472352676e-05	4.65362010201587e-05	3.8436484390479e-05	3.11491282383778e-05	6.76798546901172e-05	4.00806546056598e-05	8.12915448633313e-05	5.63163869117744e-05	0.000142654567594953	3.93244514763219e-05	0.000109660739225571	7.00121618564288e-05	6.4552069295024e-05	7.52611026267901e-05	3.30648873686644e-05	7.06122881049638e-05	4.31620475005563e-05	7.33554664082174e-05	8.04940842323192e-05	0.000152528238258873	6.83932730506082e-05	3.68853300253811e-05	7.11961836146333e-05	1.5507048314326e-05	4.94420829961072e-05	1.99746088677756e-05	0.000722724108296363	9.34883439589544e-05	0.000407055870937467	8.07597327632701e-05	0.000136899822647346	2.07589236032569e-05	5.7619519657808e-05
L3_4553_B_melitensis	4.05120489456918e-05	3.20608567682386e-05	4.29315502677344e-05	8.22741704215921e-05	4.33138064832733e-05	5.05448316943315e-05	4.5453380719491e-05	5.02865606479198e-05	4.67358482413244e-05	5.71969855041562e-05	5.01560583528456e-05	7.4057092116094e-05	8.25424005592118e-05	3.1065771003142e-05	4.60253790451914e-05	5.33420055360079e-05	3.77261898925351e-05	5.8231164974856e-05	4.39116541879649e-05	3.82623390116267e-05	6.90857124804144e-05	4.6676373817411e-05	8.0963171307351e-05	6.32121794954284e-05	0.000124827131283352	4.01392351045812e-05	8.97203008750453e-05	5.70381678236286e-05	7.43731973891183e-05	7.70663777955321e-05	3.746221898166e-05	7.25094686470983e-05	5.67913096869281e-05	7.63475689664941e-05	8.2409721818761e-05	0.000144932708536716	6.8944048772971e-05	2.91842629798081e-05	7.09131350757628e-05	2.40092989622544e-05	5.90216569504963e-05	3.13516966355102e-05	0.000724592881680832	9.75101098467086e-05	0.000352860722468307	8.01500874790584e-05	0.000120454807167037	1.86446186595605e-05	5.31408911811919e-05
L3_4554_B_melitensis	4.7184519804332e-05	4.07537934367e-05	2.86404203349844e-05	7.64467099164747e-05	4.73740378365619e-05	6.63203602378301e-05	5.17008966718988e-05	5.51233243380447e-05	3.56357430156543e-05	4.53336926603588e-05	4.21446616610318e-05	6.85753004808606e-05	6.74149164087924e-05	4.31945994606811e-05	7.18874269910456e-05	3.65959770488475e-05	5.65328009507142e-05	5.08724497648127e-05	5.12025284221389e-05	3.76796960293495e-05	6.79023747635651e-05	4.23655396074889e-05	6.54994846520976e-05	4.90180273222724e-05	0.000124126814210935	1.84837002953621e-05	0.000105693081736377	0.000363923073720458	9.59127577471864e-05	7.72990896487582e-05	3.1398476454732e-05	0.000178163825468936	5.96814938116151e-05	5.45779577709395e-05	8.29455424526664e-05	0.000127987096097086	4.68084909141089e-05	4.65107612039101e-05	5.84284836513219e-05	4.96429336479936e-05	5.11170917492719e-05	2.90122025369031e-05	0.000719140538574453	0.000100090110178068	0.000102295006891527	0.000349408322239509	0.000151590818213453	2.32163524417688e-05	4.33842241264368e-05
L3_4555_B_melitensis	4.35775877516342e-05	2.83508930212734e-05	4.88729203621511e-05	9.31396078016821e-05	4.53337239499828e-05	4.27516127804848e-05	4.76603020855387e-05	4.24406279290211e-05	3.38850907717669e-05	2.88817062609902e-05	4.87025027827877e-05	9.07097846729177e-05	8.60992353896467e-05	2.9926146370018e-05	6.3968672639633e-05	3.66679677087899e-05	3.8806513424467e-05	4.60681793587541e-05	4.45645529102046e-05	2.36455397414912e-05	8.51122405105302e-05	6.23386014686598e-05	5.41574725741037e-05	5.20952471944822e-05	0.000176507464979864	2.90768007019947e-05	9.38190149440756e-05	0.000428978581298134	0.000103117384522601	0.000100063157741088	2.24504427892497e-05	0.000185883832439529	4.44898893168523e-05	5.28611871152041e-05	5.61580884959288e-05	0.000177230965238632	3.99802202533511e-05	3.58359656235451e-05	8.3073748658128e-05	3.71377142565726e-05	4.04837746405499e-05	3.17313939096263e-05	0.000793073241729772	0.000102828720283936	0.00013011917920721	0.000249818479089058	0.000190820817303382	3.04771260442958e-05	3.22535944999039e-05
L3_4556_B_melitensis	6.15690947404848e-05	3.28566496798806e-05	3.10873797284038e-05	9.06297278598091e-05	2.53469495931355e-05	3.30960386048579e-05	8.26475462251776e-05	8.073114603647e-05	5.92645952780832e-05	4.75024090816762e-05	5.55643343661767e-05	9.35757019091972e-05	0.000103676287641643	2.25587113939315e-05	7.91662587618764e-05	4.45230215848613e-05	4.40902447836908e-05	4.31854136261253e-05	1.96956237199872e-05	3.86207789168861e-05	7.02764745624802e-05	5.53467551605632e-05	5.92883540283013e-05	0.000124352943705058	0.000181167994214914	2.73974038329394e-05	0.000151179219720315	0.0002921374144756	0.000135730869642396	5.75507655302813e-05	1.97682353463507e-05	0.000146834405584142	7.65624802838421e-05	4.06194547653905e-05	7.30375497718549e-05	0.00013381476905225	4.79514093875363e-05	3.60780001080314e-05	5.22952480527894e-05	5.30682562877932e-05	4.67331103257075e-05	3.49543253727956e-05	0.000874975677085892	9.39126402955241e-05	0.000108251852952592	0.000218316098719508	0.000122132614229323	2.35929490351006e-05	2.46169435267935e-05
L3_4557_B__melitensis	5.37653812739888e-05	2.64738169989495e-05	3.3938921867923e-05	8.9023168481323e-05	4.24928712996925e-05	4.00505212610151e-05	0.000112489971327223	4.40612361594932e-05	2.01715642190075e-05	4.04752221720289e-05	0.000122271517737477	7.51770186253933e-05	9.00659049462241e-05	4.15761601724433e-05	7.81365487457985e-05	4.7360977099767e-05	5.06222993214112e-05	4.23874824223013e-05	4.79552379670715e-05	1.27542483976269e-05	9.46471021719639e-05	0.000149773828879959	6.60220816805787e-05	5.60501719387872e-05	0.000228304914975503	4.53646770599271e-05	7.62293068364264e-05	0.000749950959496744	0.000210039251465491	0.000119579817701679	3.81389666808169e-05	0.000276480872259227	6.44306071332396e-05	3.2003713520051e-05	6.53714645697895e-05	0.00021916258470628	3.39431930424776e-05	0.000114438700671314	8.8476122327987e-05	6.16766379483922e-05	3.66277340112763e-05	5.36506103795977e-05	0.00120536074736144	0.000165688246753	0.000136169271403044	0.000208552118641399	0.000159349818321488	3.61457306461087e-05	1.98388932238073e-05
L3_4558_B__melitensis	3.01339568912581e-05	3.42614824152666e-05	1.65399404466773e-05	7.90527232198805e-05	3.11957040904117e-05	3.45031164870353e-05	0.000102400598744393	2.91412457711521e-05	1.53084475581243e-05	1.88714116160209e-05	8.97633653816082e-05	8.64046214374596e-05	7.21049551737156e-05	2.18399526620047e-05	6.22579821483946e-05	3.87242279002699e-05	3.32423234856264e-05	3.95463982121893e-05	3.62651216400628e-05	1.66349173100067e-05	9.04188321011233e-05	5.65288457019501e-05	5.69709817585703e-05	6.50380372306351e-05	0.000279872600802005	3.2071349014658e-05	8.91016191063378e-05	0.000522474677309793	0.000175549133087324	0.000127790471154852	2.45026508444454e-05	0.000205228377766888	8.43478747235299e-05	2.62796289436914e-05	7.64936946994145e-05	0.000264275909514433	4.13287865280228e-05	2.83790631747089e-05	8.50287119141024e-05	5.76309859144757e-05	3.05626314311773e-05	3.66682841005796e-05	0.00125941851125006	0.000150151558817966	0.000111106843113737	0.000398013141604529	0.000241899821603751	4.09910967441792e-05	1.13293928790333e-05
L3_4559_B__melitensis	3.73135765587161e-05	2.63755999791597e-05	2.08987925375099e-05	9.82453298748549e-05	4.26926287880411e-05	3.81882755191431e-05	5.11525762209217e-05	2.85134165681778e-05	2.76951283572632e-05	2.16928904857853e-05	7.05521080046886e-05	9.29673537316307e-05	7.67116882651715e-05	2.37592849775797e-05	9.46419107290341e-05	3.66601698156032e-05	3.58931155014534e-05	4.69025733879658e-05	3.63721634856385e-05	1.36229058866705e-05	0.000100482668932213	6.35690191851054e-05	4.86379291165819e-05	6.76214024403673e-05	0.000261447675543428	2.81258576140287e-05	9.54443290968523e-05	0.000574298163149505	0.00018778158504103	0.000191639317304291	4.54394750774439e-05	0.000244714786240367	6.63919956555306e-05	5.65649384478453e-05	7.04564515445485e-05	0.000255261558074535	4.4145171041837e-05	2.44582637103111e-05	9.76521041725255e-05	4.17399734724885e-05	3.69942629262639e-05	2.22384071639622e-05	0.000906354033201997	0.000102555317905945	0.000114770155519534	0.000480473981409461	0.000336984759985645	5.18203689594615e-05	2.70094842707228e-05
L3_4560_B__melitensis	3.61159768110565e-05	6.08269317706989e-05	2.17830141521258e-05	9.37551682793939e-05	6.1176749235081e-05	5.56855095804534e-05	3.19041285333996e-05	6.71156320204462e-05	5.0869614750605e-05	5.19669556993384e-05	4.61903347615378e-05	7.5659254039073e-05	4.09507482732245e-05	9.85094857942031e-05	8.57635320094071e-05	5.50692098521216e-05	8.09783891055708e-05	4.96908552080492e-05	7.25818728786703e-05	3.70408154158984e-05	5.22099260766951e-05	0.000100974323833569	0.000722056217264089	0.00019265317267707	7.20405958270071e-05	5.62207713375755e-05	0.000228021605870506	0.000239601005843876	9.02610409245045e-05	4.0525404293662e-05	0.000113114347719819	0.000132389794571141	0.000109336282448851	2.22853532950774e-05	9.61553284413633e-05	7.57274382102819e-05	2.52961745531683e-05	4.74409766279309e-05	6.02840133149883e-05	7.95602310735816e-05	0.000160264832163699	2.4671856155164e-05	0.000744470591396426	0.000127475362190876	2.54054529616212e-05	0.000168175463271428	8.79915023011658e-05	6.05153552401931e-05	8.86137874286119e-05
L3_4561_B__melitensis	3.92498954358058e-05	2.83649723417322e-05	1.97061342708076e-05	7.18006433013639e-05	3.27074476163272e-05	3.91904690368361e-05	0.000115960541901006	2.99956609814206e-05	2.17505655933009e-05	2.71647097472515e-05	2.19649562851988e-05	0.000172298548267615	6.84625926767163e-05	3.02672546092731e-05	5.27933825507778e-05	3.54663231685528e-05	2.65258965528685e-05	2.95629563166e-05	3.05231531632595e-05	1.61520677244661e-05	8.36635754864357e-05	3.18731670055216e-05	5.49810137516443e-05	5.53489900955474e-05	0.000284696060430516	4.09739686454271e-05	9.63769424650653e-05	2.25118126995066e-05	5.20604355127132e-05	0.000597189422167604	0.000183075887916708	5.04585219767079e-05	0.000223569174158705	6.19667182301388e-05	5.47043551717001e-05	0.000289400465883608	4.35783392900138e-05	3.04790032522154e-05	0.000105246353260811	6.67889746571709e-05	3.60281147976534e-05	3.86629710853661e-05	0.0011663098320753	0.000148058440482594	0.000109718846851939	0.000378886873488133	0.000282595770274975	4.61161295066902e-05	1.44844261218689e-05
L3_4562_B__melitensis	6.20574759826554e-05	3.54135496850293e-05	3.71632427267297e-05	8.72904639428982e-05	3.59862846542269e-05	6.63369749699539e-05	5.16062536614523e-05	5.86963589971547e-05	3.51586791586713e-05	5.51651249482897e-05	5.17989260853866e-05	9.1812950316987e-05	6.56964741172996e-05	3.60216140439972e-05	5.98026652112779e-05	3.52017880038768e-05	5.5127412554673e-05	3.90377472992923e-05	5.66011296634398e-05	2.29150784952019e-05	8.5366379330528e-05	4.99239439441385e-05	0.000119891356923297	6.43577672127269e-05	0.000178815438196911	2.76527758520702e-05	0.000179381817118556	0.000230651155365823	0.000120265208610253	7.19402386322699e-05	2.77579896112666e-05	0.000126606490491156	8.35629615160635e-05	6.60861539092407e-05	8.73234429763543e-05	0.000155957880477256	5.39217006401561e-05	3.90185696207039e-05	5.54306329399171e-05	6.0534399827039e-05	6.4824904394933e-05	3.23664064914935e-05	0.000819807949099608	0.000128619859436251	8.87883279798996e-05	0.000491991973927303	0.000202540613082187	4.31776335382785e-05	5.68176874197625e-05
L3_4563_B__melitensis	3.43664129548258e-05	3.27716922171447e-05	2.67733316481473e-05	7.22121695307681e-05	6.40554311399959e-05	3.99307878288043e-05	5.42367058734114e-05	2.5967901848027e-05	4.43852179487015e-05	2.85340499478e-05	1.75239599749302e-05	0.000103274480199867	7.64633095094781e-05	2.86478819113634e-05	8.10743418156043e-05	3.72469528637982e-05	2.6176803802612e-05	3.86962042644863e-05	3.53926980456572e-05	1.80893816007428e-05	9.2701398252308e-05	3.84986326475484e-05	4.93661298611904e-05	7.03000856229206e-05	0.00026230515876793	3.76324076019094e-05	9.22407065160358e-05	1.7105331890423e-05	4.51823148097669e-05	0.000238171526463996	7.80288242238088e-05	3.56226390587844e-05	6.15718704749035e-05	6.70967857174848e-05	4.85079686752204e-05	0.000302914417274694	8.07705601236212e-05	2.56517946555004e-05	0.000149724602622603	4.71818536057534e-05	3.3364771566171e-05	2.81847417769154e-05	0.000837840160135119	0.000104519350596504	0.00010331177915743	0.000440730121537878	0.000439487482098478	8.43504502928452e-05	4.22287303692214e-05
L3_4564_B__melitensis	4.32022783415097e-05	3.32273967464579e-05	2.59715617551645e-05	7.58494770855215e-05	4.89614792586181e-05	3.51370754437808e-05	0.000102793112567276	3.70549941350487e-05	2.6625115023077e-05	2.92522623284708e-05	2.99883332017736e-05	0.000102161254614795	7.32853960862382e-05	2.89329095120922e-05	5.66655940577283e-05	2.43874393357812e-05	2.66073291779638e-05	3.88303905196174e-05	3.79911060450628e-05	1.34966999801481e-05	8.67028195225873e-05	4.04289782813268e-05	5.65153992807768e-05	6.91135673086303e-05	0.000273123491339828	3.40153220790079e-05	0.000111870172438665	1.96887428519824e-05	5.55773010015853e-05	0.000164860773031064	6.0475254874719e-05	3.26209181837172e-05	5.32440770277114e-05	5.36939686101626e-05	4.86517463475652e-05	0.000308234547368926	6.68576938726649e-05	2.58024879870467e-05	0.000145847015765811	7.2106085177907e-05	4.14660583555758e-05	3.97330225935474e-05	0.00109371433531242	0.000122979786080369	0.000126919221182678	0.000427028325034403	0.000360462030375354	7.43591588059176e-05	2.45894385690286e-05
L3_4565_B__melitensis	4.71183408239984e-05	3.64347890503655e-05	2.8624365734008e-05	8.79700523852308e-05	4.14920491142086e-05	4.1079115494529e-05	6.38378030002124e-05	4.52902741761876e-05	3.22125332620954e-05	4.38668472284041e-05	2.88153370052249e-05	7.0394375788221e-05	7.77984316507827e-05	2.91346065515087e-05	6.99621897163912e-05	4.27290276726599e-05	4.33984993998056e-05	4.70056941856516e-05	4.88915065371621e-05	3.01945131913803e-05	7.83483769886151e-05	7.21042176548098e-05	8.09405461866814e-05	6.12077070600534e-05	0.000127759136811161	2.85852071357549e-05	0.000143056747503938	3.10117047487218e-05	7.72015125016152e-05	9.13499067887999e-05	3.81424513987155e-05	7.6643580332253e-05	5.63431870462321e-05	3.8432351612151e-05	7.8074835735601e-05	0.00018142643004564	4.52531259284501e-05	3.09870838374394e-05	0.00011580558863558	4.60405055416462e-05	4.43808963729552e-05	3.12868406877901e-05	0.000822689584354592	8.34777882403905e-05	7.31810154248772e-05	0.000210487066803876	0.000175534915293336	2.22528113339985e-05	2.3624630556736e-05
L3_4579_B__melitensis	3.07809538966751e-05	3.56481457120642e-05	1.59061228158895e-05	7.61257683397227e-05	3.52987570241283e-05	4.86897017590428e-05	5.13307638474314e-05	3.99523008341873e-05	4.36890645967902e-05	3.98843071122948e-05	2.65362138439114e-05	6.92082409426844e-05	7.53850750463035e-05	2.22371458620153e-05	5.76657052241925e-05	2.46564135344622e-05	5.07381308935374e-05	4.20239783034387e-05	4.05911484762409e-05	2.69095887460909e-05	6.80494250509583e-05	2.99693507101195e-05	8.11313931740577e-05	6.32447374921615e-05	0.000182654511995229	4.02573847899396e-05	0.000111921999503284	3.06588701778147e-05	5.47903710221618e-05	8.18506723099644e-05	3.21360420808294e-05	0.000103035415424475	5.01116635593679e-05	5.85696117270945e-05	7.84850697588602e-05	0.00018358768127657	4.353181838043e-05	3.85419634608891e-05	0.000107900838465434	4.0906461887503e-05	4.38577380543284e-05	2.04887903211091e-05	0.000888266204403869	9.52096537937593e-05	8.18539134587635e-05	0.000303574067667563	0.00015477329295249	1.7665254346475e-05	2.67936186856131e-05
L3_4588_B__melitensis	2.43799234313964e-05	2.77440528921117e-05	2.00222514772925e-05	5.75914034247232e-05	3.34312164136009e-05	4.14830294823788e-05	5.26941313236913e-05	5.34996238048912e-05	3.42062935008404e-05	3.62513432910759e-05	3.17907164182263e-05	9.5067661328447e-05	6.52185389367465e-05	2.15531090685201e-05	5.24402119669511e-05	2.95443704019482e-05	3.69222106067387e-05	4.45183534181258e-05	2.73332579160288e-05	2.06290425229359e-05	8.58617772878032e-05	6.82212038049066e-05	7.23424104402556e-05	6.14833742006083e-05	0.000206581157985927	3.14581356671125e-05	0.000129142290435782	0.000166250364517947	6.70248067415619e-05	0.000102077233097557	2.63551639708062e-05	9.59326017559349e-05	4.81857859707154e-05	7.46368177750123e-05	3.18615604835368e-05	0.000198766738595998	4.5411554949034e-05	3.06697024008933e-05	8.33141210888371e-05	4.03399248814635e-05	4.56905566178397e-05	2.69223983494289e-05	0.00085842536898449	0.000108837658512844	0.000118102445493925	1.25570808485703e-05	0.000191488616266437	2.45719871601629e-05	5.90299211619345e-05
L3_4589_B__melitensis	7.14309060170419e-05	2.64942904726424e-05	0.000117395468461019	5.09470146950256e-05	0.000105903089352904	4.29576468819317e-05	6.20125264351901e-05	5.28387687003569e-05	2.34570709872041e-05	4.17457059645097e-05	1.93148456238685e-05	7.76958315980319e-05	5.4728986357078e-05	2.95464940178635e-05	4.57096425039415e-05	2.93323973308477e-05	3.90959989847708e-05	3.66605073301576e-05	5.66453333569797e-05	2.49591296730299e-05	7.77855439693702e-05	4.15775051877359e-05	5.77375274720874e-05	5.80698217937683e-05	0.000131730868829698	2.89806240531871e-05	0.000128276999285473	2.87814729074755e-05	5.00136946215084e-05	8.60946780002844e-05	3.04927254050465e-05	6.22540975913108e-05	4.48611841968232e-05	4.43617203556891e-05	5.70125225833269e-05	0.000147363307099534	3.83814861004567e-05	2.63178714067156e-05	8.95548279121506e-05	3.54680247488981e-05	4.485622499767e-05	3.7304365539584e-05	0.000579701015808853	8.51000080337055e-05	0.00010626294426662	0.000244684456103598	0.000221519950489108	4.08046168593889e-05	3.32967765351117e-05
L3_4590_B_melitensis	6.22697031353639e-05	1.60732414624393e-05	7.43039206241063e-05	5.78715397461162e-05	8.07525804341473e-05	3.85769762306168e-05	6.63606185012824e-05	6.25686579702875e-05	3.75169723653746e-05	5.14720136862703e-05	2.99985413363116e-05	0.000100390559357809	7.61620356180358e-05	3.92982284605134e-05	5.63079997319645e-05	4.01682210154195e-05	4.29370483174235e-05	3.29224053328896e-05	3.96191756216888e-05	2.32410836799438e-05	8.6154635881208e-05	3.92301754793605e-05	5.65623890370366e-05	5.11301115360315e-05	0.000184574181358736	2.83803376627799e-05	0.000119414276499319	2.26209876218759e-05	6.38631202707905e-05	8.13904072296686e-05	4.2751116439912e-05	7.54568068590515e-05	5.0896718664188e-05	6.02374958546401e-05	7.11057964882427e-05	0.000201030732959832	5.40605513720672e-05	2.79286350711265e-05	0.000112205110328459	3.93450278954348e-05	4.20796952706302e-05	3.40679916021337e-05	0.000779461475790578	8.66204395830204e-05	0.000122346809422113	0.000332930874128105	0.000212820782176663	2.7848411776089e-05	2.4444596904397e-05
L3_4599_B__melitensis	5.3758676203316e-05	2.35254181711467e-05	2.47614037883449e-05	6.92791009092822e-05	3.38559466098995e-05	3.93774431750946e-05	7.07282077153365e-05	5.69361825855026e-05	2.56941267814251e-05	4.69183185782528e-05	5.17015999621281e-05	8.61899310527715e-05	7.0464103703829e-05	5.18788913842934e-05	6.94503346507654e-05	3.77597763395076e-05	3.59945141375733e-05	4.20882836435917e-05	5.03749450294368e-05	4.19732004452319e-05	9.80347603901467e-05	3.49631196778997e-05	0.000120923438023988	9.27887422805576e-05	0.000193269691255012	2.39705328879945e-05	0.000164490509518136	2.74528343846793e-05	6.45960502239606e-05	7.36817945397396e-05	5.69609728055133e-05	3.63736269084204e-05	0.000127206703792775	7.97686828833957e-05	0.000129380422644314	0.000158364011393379	4.20214261141475e-05	5.84410446798067e-05	8.85385188298126e-05	0.000169994646823472	3.4664512578021e-05	9.06051664557182e-05	0.000882182781208958	9.72356119954245e-05	8.45123347014219e-05	0.000417135184244862	0.000164589654749718	3.37855558413742e-05	3.34561419746392e-05
L3_4602_B__melitensis	7.55781918352792e-05	3.71864125687907e-05	5.01455482802143e-05	7.22482956493431e-05	6.24360721093458e-05	3.62809958896115e-05	6.61021008515777e-05	5.34284288003654e-05	2.93692592307958e-05	4.29323642533774e-05	5.29942330268751e-05	9.30017935122838e-05	7.55078628328237e-05	5.91197507951201e-05	4.84108430030037e-05	0.000101878068065895	4.21814358571758e-05	4.43241613304097e-05	5.90347414151541e-05	4.81220189840597e-05	5.43088660994525e-05	7.36245045104185e-05	8.6302505972216e-05	0.000121150153689684	0.000184229706686628	1.67930250490938e-05	0.000330491212064335	9.71803145317886e-05	0.000107459152704311	3.91194255781276e-05	3.79221890636248e-05	8.44111363856753e-05	0.000117222352141923	6.82619448568643e-05	7.70436832944356e-05	0.000104555683095313	5.43822198490034e-05	4.44639847689193e-05	7.99616688476106e-05	9.13777366534325e-05	4.42217198463111e-05	5.9273832971993e-05	0.000997683832949629	0.000144464704705419	4.89128017565327e-05	0.000217387596759688	6.74736870905257e-05	2.33354308366307e-05	0.000100681427122291
[truncated: 390 more columns]
