# Supplementary figures and images for: Machine Learning Algorithms for Classification of MALDI-TOF MS Spectra from Phylogenetically Closely Related Species Brucella melitensis, Brucella abortus and Brucella suis
Source: MDPI journal article supplement (doi:10.3390/microorganisms10081658), 2022-08-17

**Figure S5:** Average silhouette coefficient vs. different distance-linkage combinations.

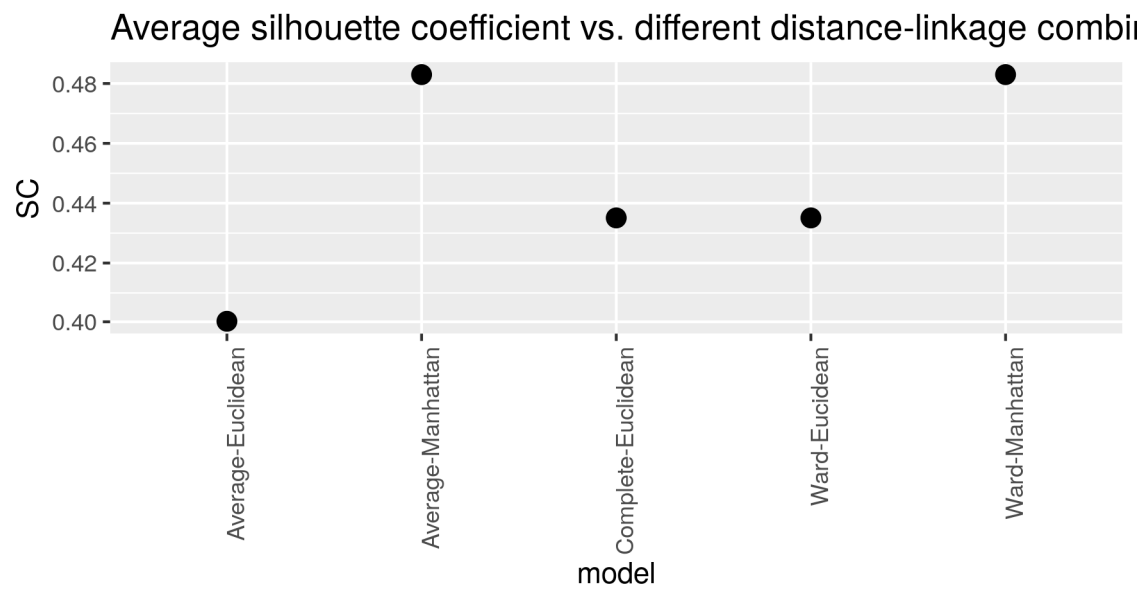

Supplement: s1 [file s1]

**Figure S2:** Box-plot displaying Peak.6715 for the Kruskal-Wallis and Wilcoxon tests.

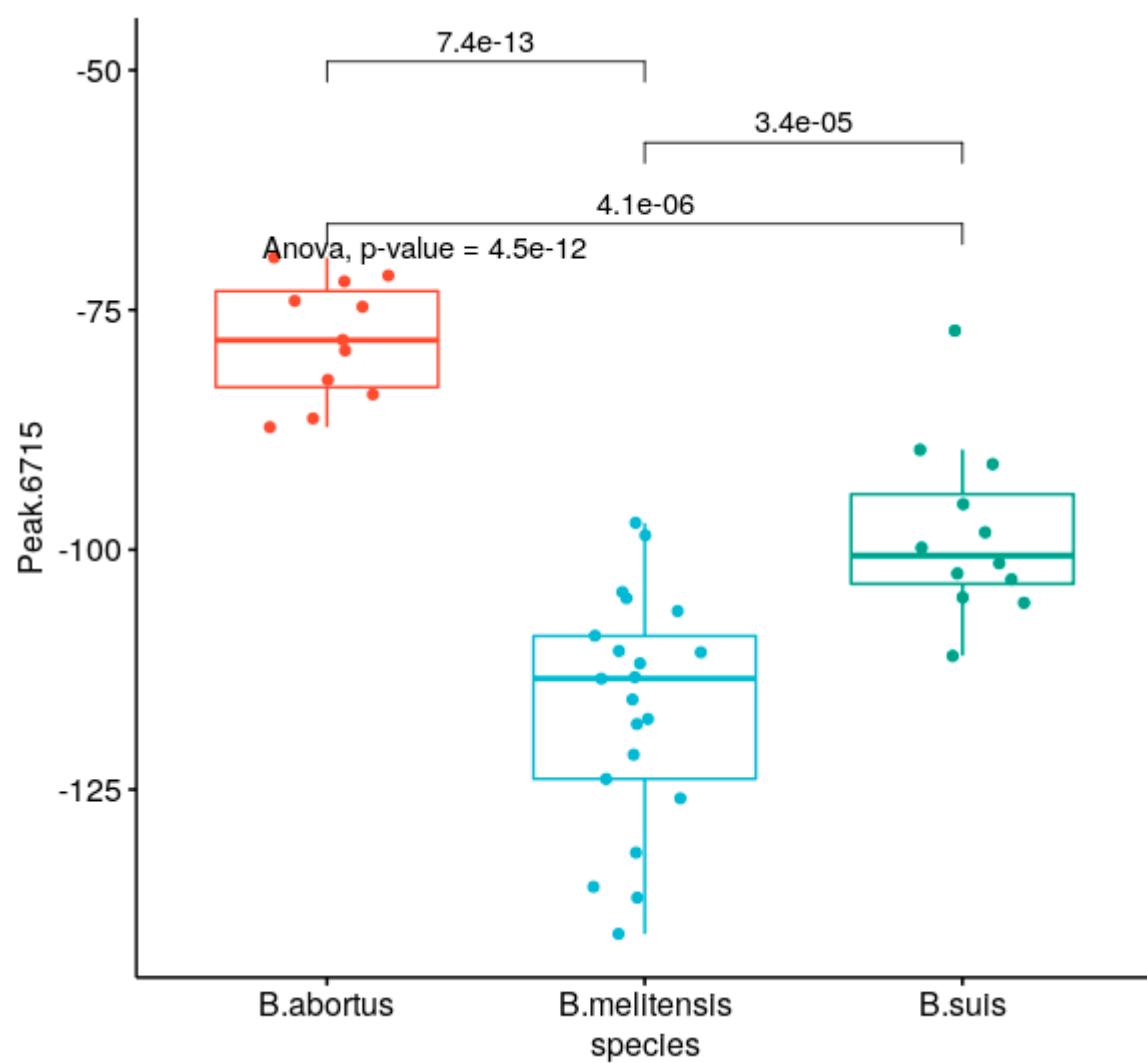

Supplement: s1 [file s1]
